# Supplementary material
Source: PubMed Central journal article supplement (PMC5659761)
Supplement: NIHMS910431-supplement-1.pdf [file NIHMS910431-supplement-1.pdf]

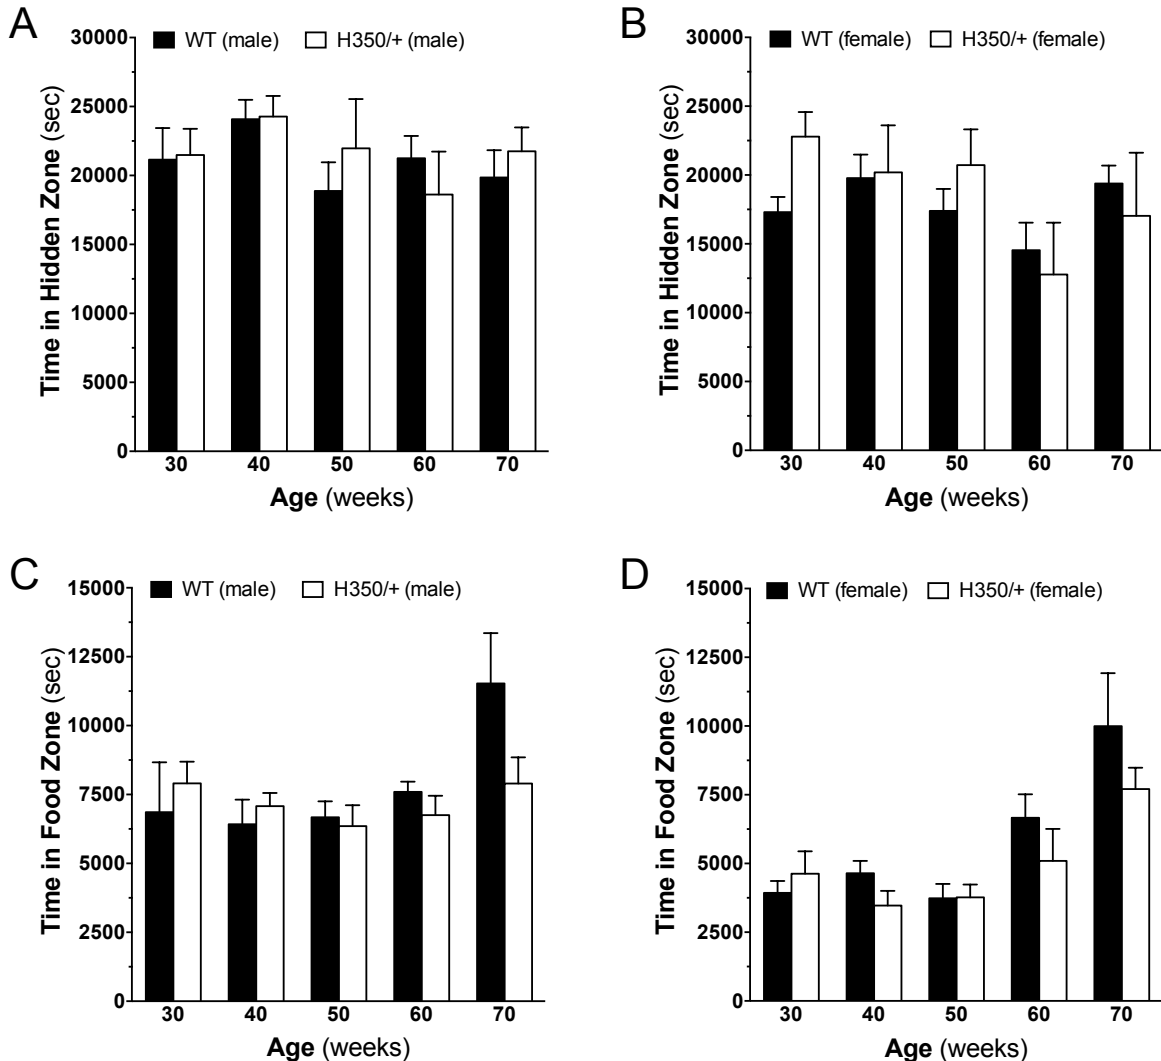

**Supplementary Figure 1.** HdhQ350/+ (A) males and (B) females spent similar amounts of time in the hidden zone compared to their respective wild-type littermates at all time points. HdhQ350/+ (C) males and (D) females spent similar amounts of time in the food zone compared to their respective wild-type littermates. N=7-8 for all groups. Error bars represent S.E.M., with two-way ANOVA with Bonferroni post-hoc test.
