# Supplementary material
Source: PubMed Central journal article supplement (PMC5659761)
Supplement: NIHMS910431-supplement-2.pdf [file NIHMS910431-supplement-2.pdf]

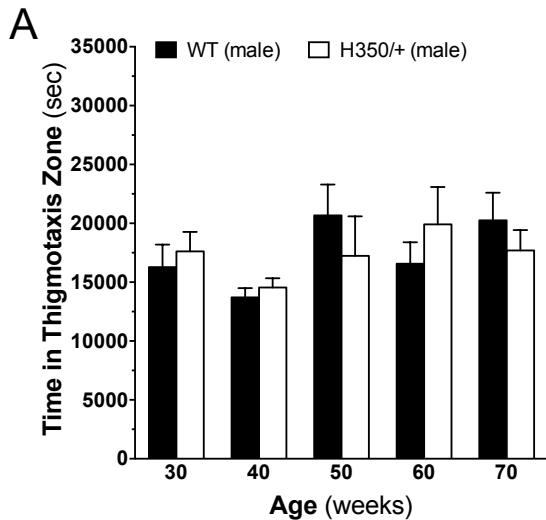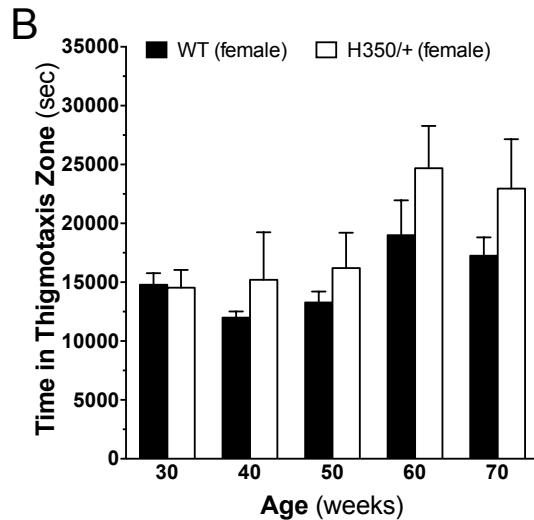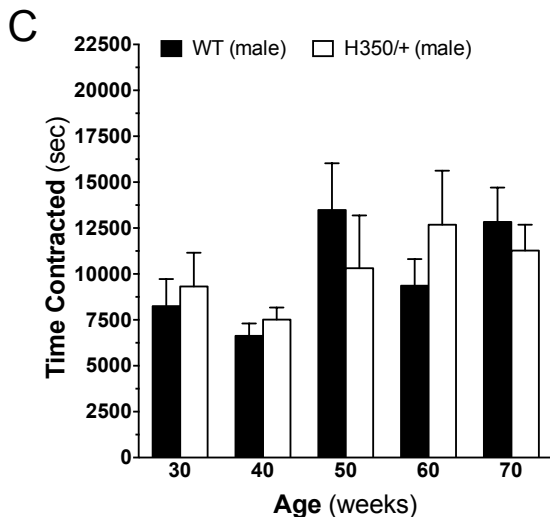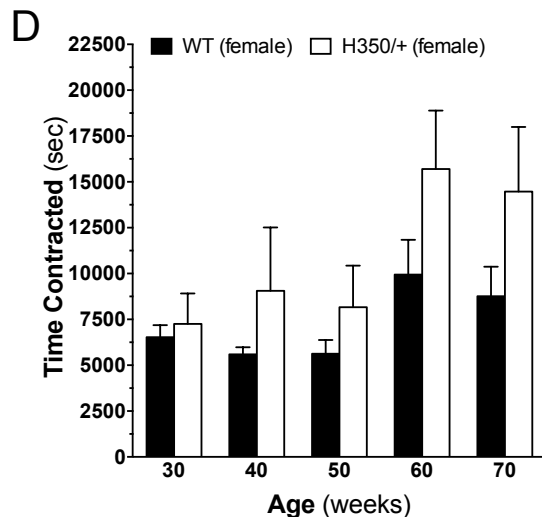

**Supplementary Figure 2.** HdhQ350/+ (A) males and (B) females spent similar amounts of time along the walls of the Phenotyper chamber, compared to their respective wild-type littermates at all time points. (C) Male HdhQ350/+ mice spent similar amounts of time with their bodies contracted than their male wild-type littermates but (D) female HdhQ350/+ mice spent more time contracted than female wild-type littermates. N=7-8 for all groups. Error bars represent S.E.M., with two-way ANOVA with Bonferroni post-hoc test.
