# Supplementary material
Source: PubMed Central journal article supplement (PMC5659761)
Supplement: NIHMS910431-supplement-3.pdf [file NIHMS910431-supplement-3.pdf]

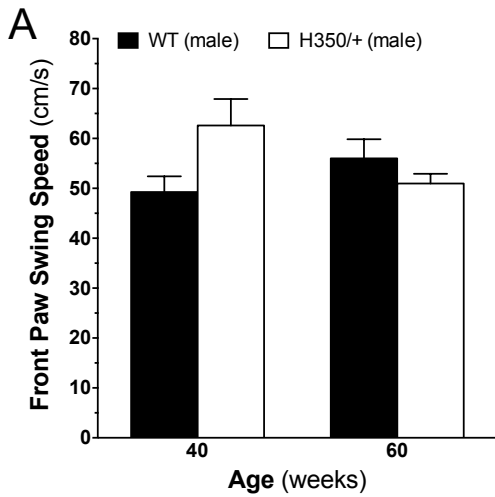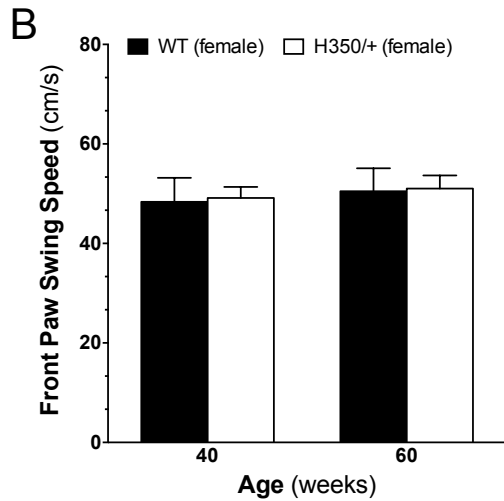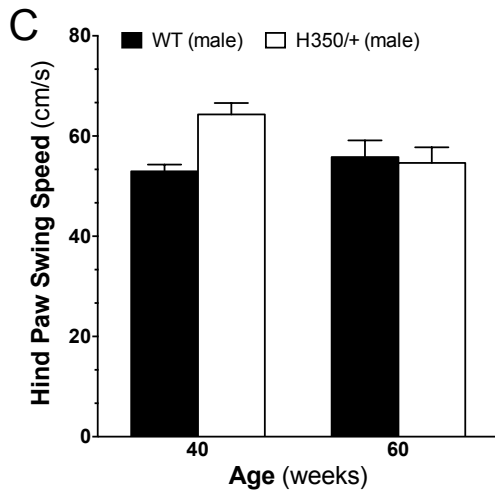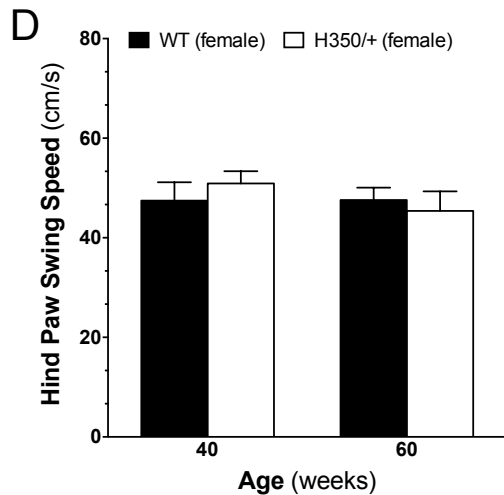

**Supplementary Figure 3.** HdhQ350/+ (A) males and (B) females had similar front paw swing speeds than their respective wild-type littermates at 40 and 60 weeks of age. HdhQ350/+ (C) males and (D) females had similar hind paw swing speeds than their respective wild-type littermates. N=6-8 for all groups. Error bars represent S.E.M., with two-way ANOVA with Bonferroni post-hoc test.
