# Supplementary material
Source: PubMed Central journal article supplement (PMC5659761)
Supplement: NIHMS910431-supplement-4.pdf [file NIHMS910431-supplement-4.pdf]

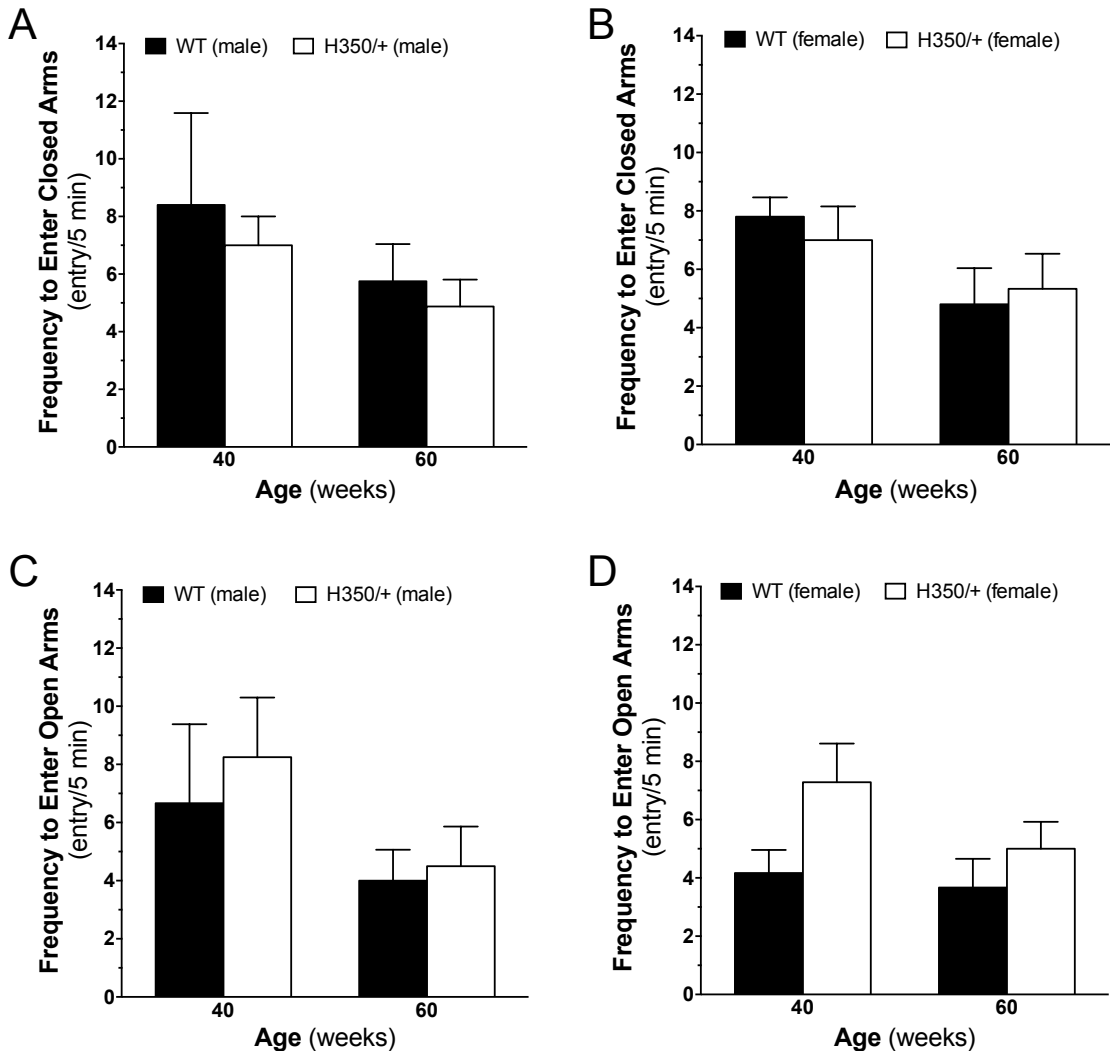

**Supplementary Figure 4.** HdhQ350/+ (A) males and (B) females had similar frequencies to enter the closed arms of the elevated plus maze compared to their respective wild-type littermates at 40 and 60 weeks of age. (C) HdhQ350/+ males had similar frequencies to enter the open arms compared to male wild-type littermates but (D) HdhQ350/+ females had an increased frequency to enter the open arms compared to female wild-type littermates. N=7-8 for all groups. Error bars represent S.E.M., with two-way ANOVA with Bonferroni post-hoc test.
