# Supplementary material
Source: PubMed Central journal article supplement (PMC5659761)
Supplement: NIHMS910431-supplement-5.pdf [file NIHMS910431-supplement-5.pdf]

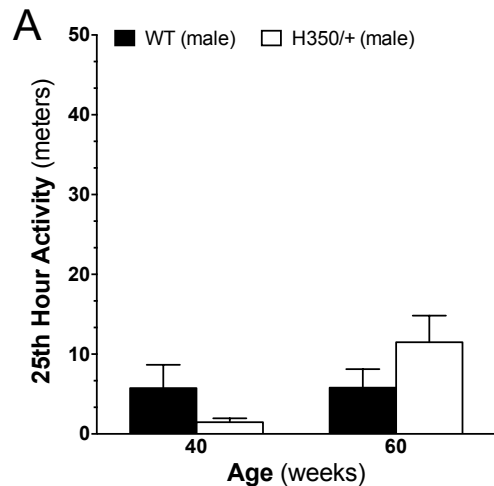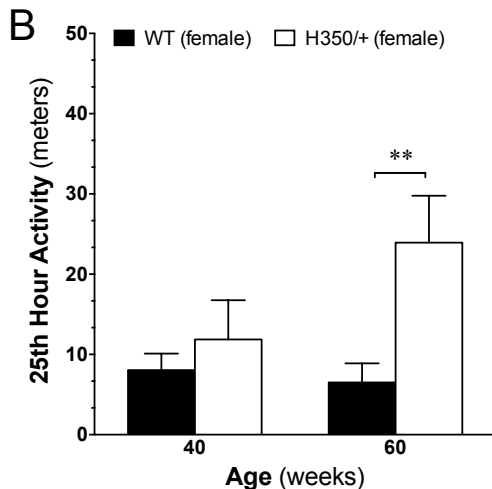

**Supplementary Figure 5.** Locomotor activity was measured at the 25th hour of being placed in the PhenoTyper chamber. (A) HdhQ350/+ male mice covered similar distances compared to male wild-type littermates but (B) female HdhQ350/+ mice covered more distance compared to female wild-type littermates. N=7-8 for all groups. Error bars represent S.E.M. and \*\*p<0.01 with two-way ANOVA with Bonferroni post-hoc test.
