# Supplementary material
Source: PubMed Central journal article supplement (PMC5659761)
Supplement: NIHMS910431-supplement-6.pdf [file NIHMS910431-supplement-6.pdf]

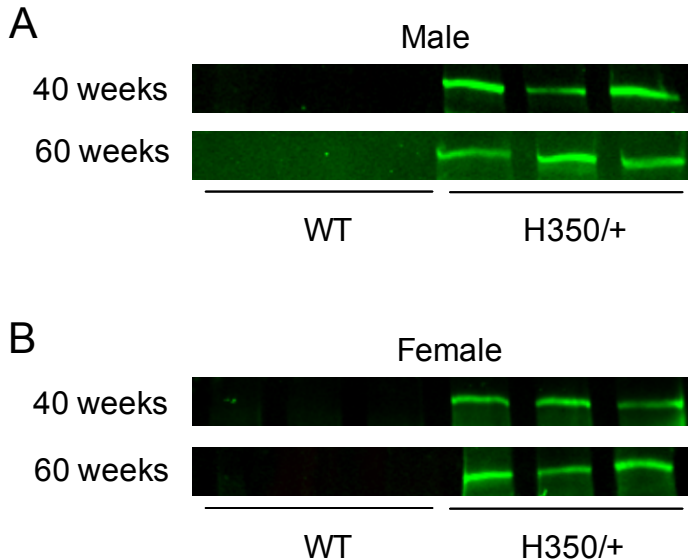

**Supplementary Figure 6.** Western blot of polyglutamine expansion at 40 and 60 weeks of age in (A) male and (B) female HdhQ350/+ mice compared to their respective wild-type littermates.
