# Supplementary material
Source: PubMed Central journal article supplement (PMC5659761)
Supplement: NIHMS910431-supplement-7.pdf [file NIHMS910431-supplement-7.pdf]

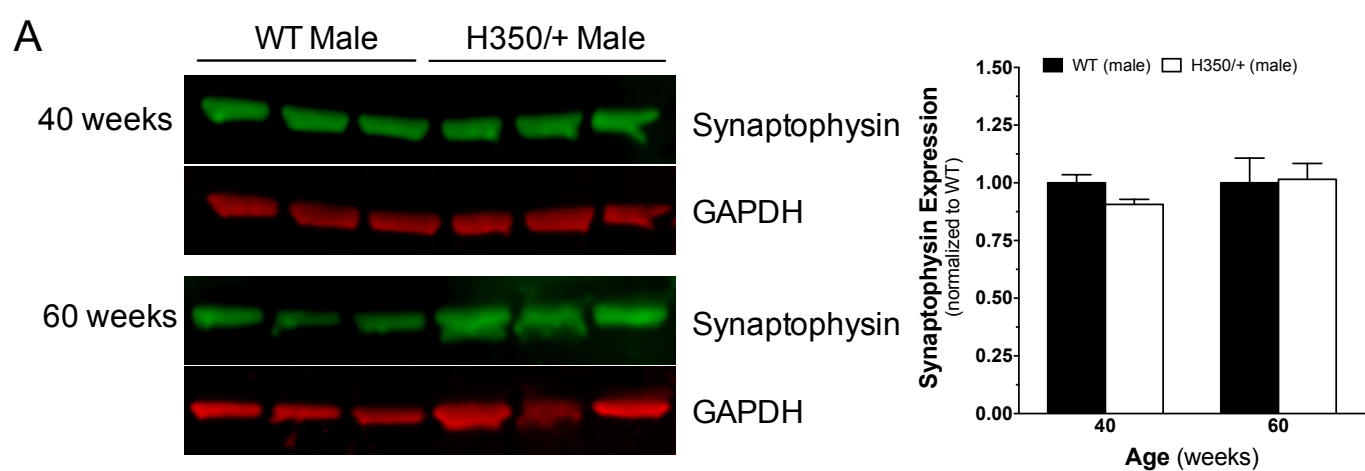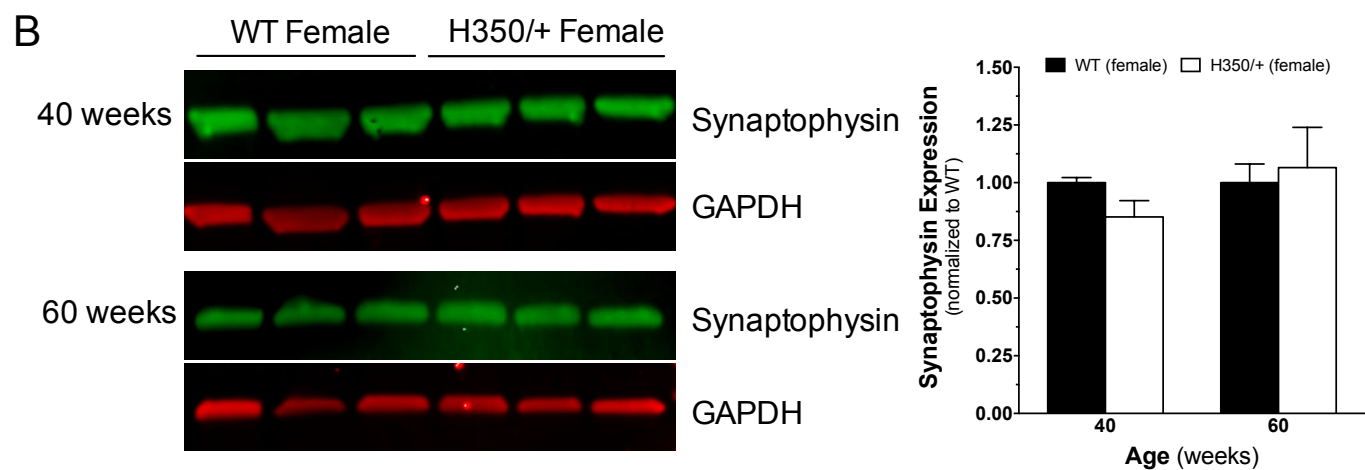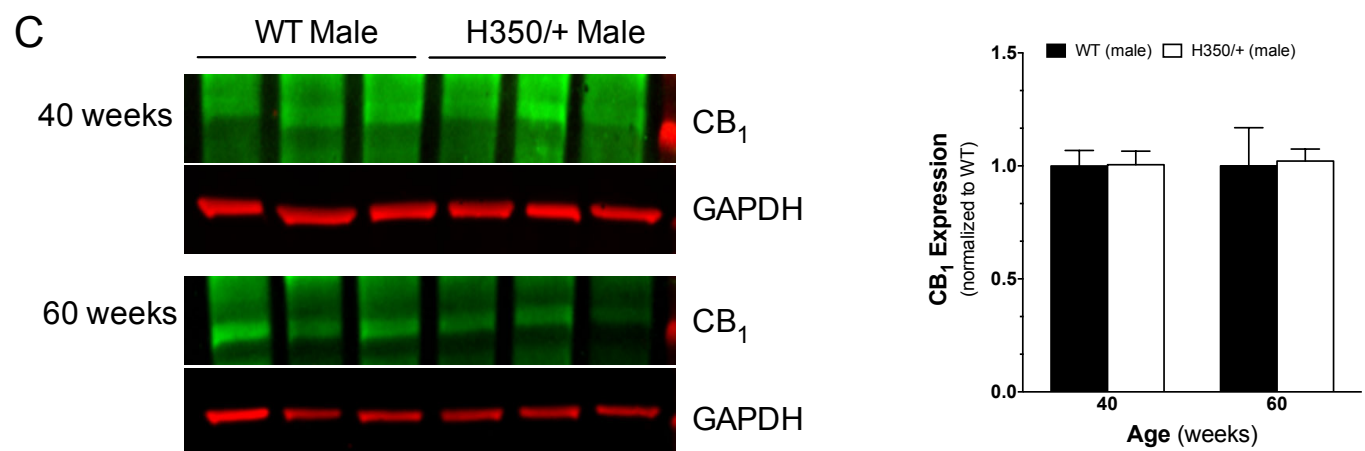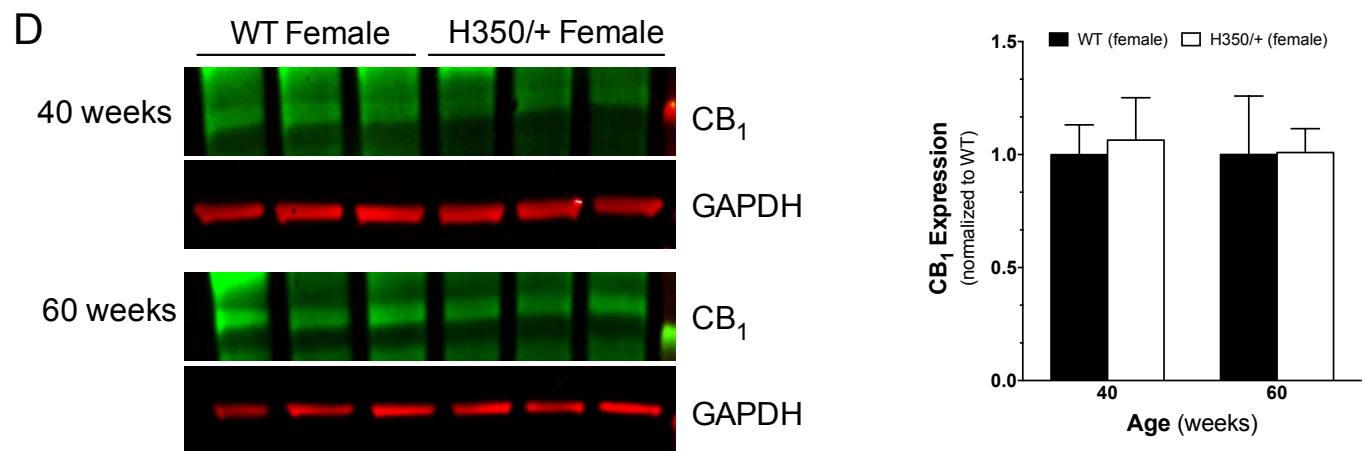

**Supplementary Figure 7.** Striatal western blot analysis of synaptophysin in (A) male and (B) female HdhQ350/+ and respective wild-type littermates at 40 and 60 weeks revealed no change in synaptophysin expression. Striatal western blot analysis of CB<sub>1</sub> in (C) male and (D) female HdhQ350/+ and respective wild-type littermates at 40 and 60 weeks revealed no change in CB<sub>1</sub> expression. Error bars represent S.E.M., with two-way ANOVA with Bonferroni post-hoc test.
