# Supplementary material
Source: PubMed Central journal article supplement (PMC5659761)
Supplement: NIHMS910431-supplement-8.pdf [file NIHMS910431-supplement-8.pdf]

A

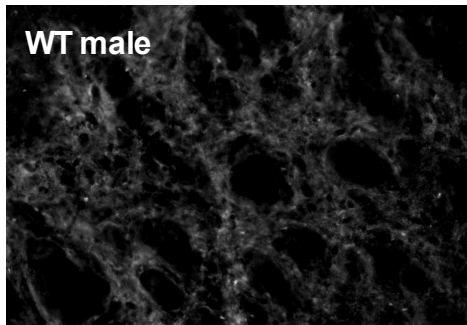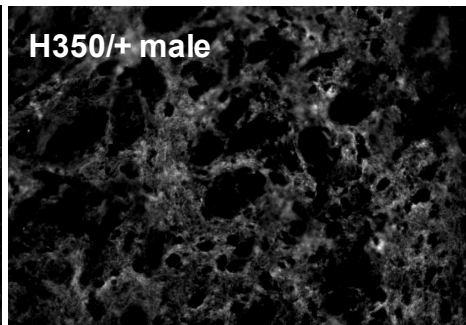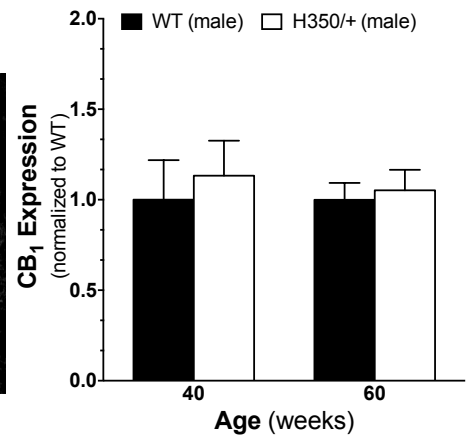

B

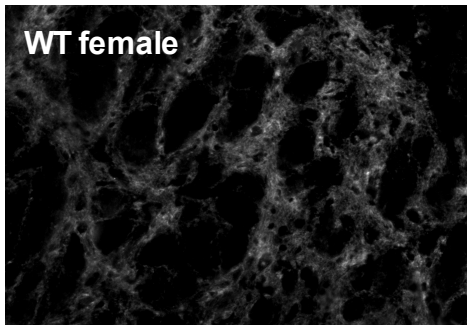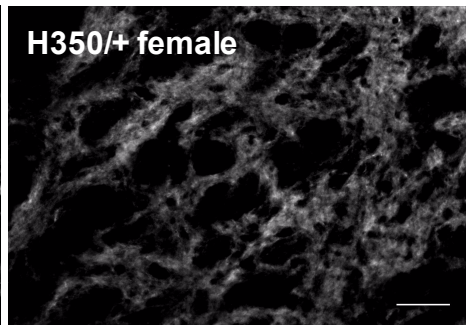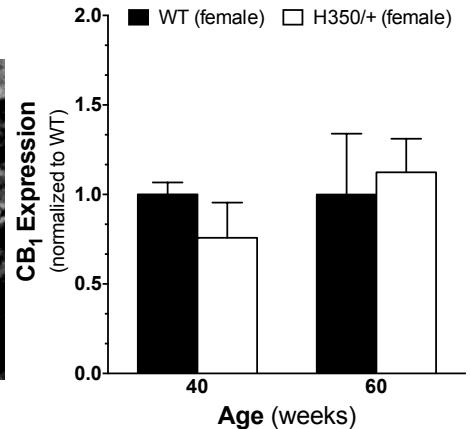

**Supplementary Figure 8.** Representative images of CB<sub>1</sub> immunoreactivity at 60 weeks of age. CB<sub>1</sub> was co-stained with enkephalin to assess for changes on the axon terminals of MSNs projecting into the globus pallidus. HdhQ350/+ (A) males and (B) females showed similar levels of CB<sub>1</sub> immunoreactivity compared to respective wild-type littermates. Scale bar denotes 50um. N=3 for all groups. Error bars represent S.E.M., with two-way ANOVA with Bonferroni post-hoc test.
